# Supplementary material
Source: publisher site journal article supplement (https://www.dovepress.com/get_supplementary_file.php?f=499101.docx)
Supplement: Supplementary file 1 [file get_supplementary_file.php]

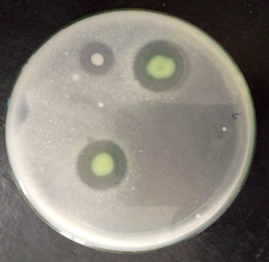


**Figure S1:** Skim milk agar plate: The halozones surrounding the colonies indicate the hydrolysis of skim milk by protease enzyme


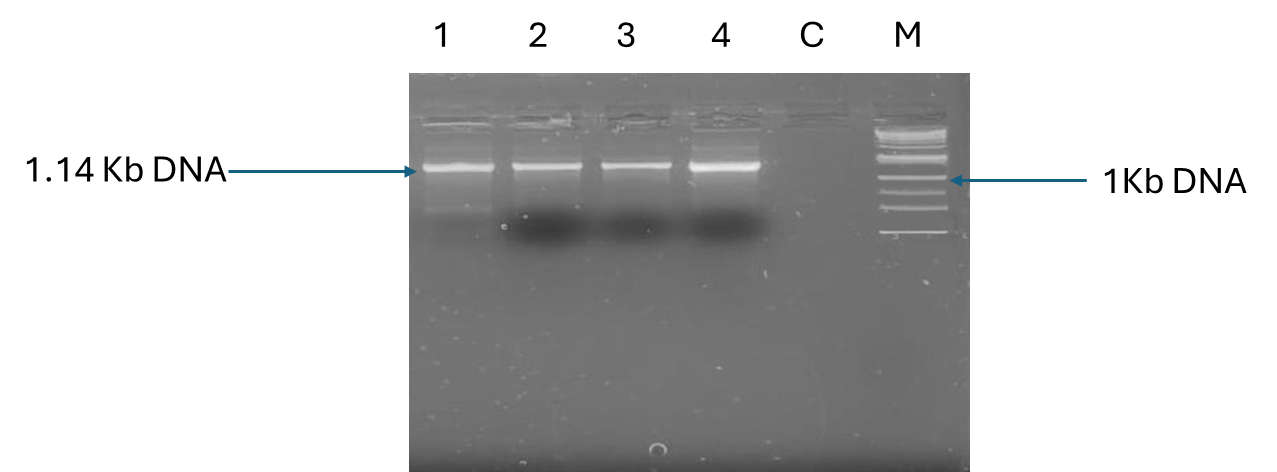


**Figure S2:** Amplification of Subtilisin gene from Bacillus haynesii (Lane 1-4: Subtilisin

carlsberg from four strains of Bacillus haynesii, Lane 5: Control and Lane 6: 100 bp marker)


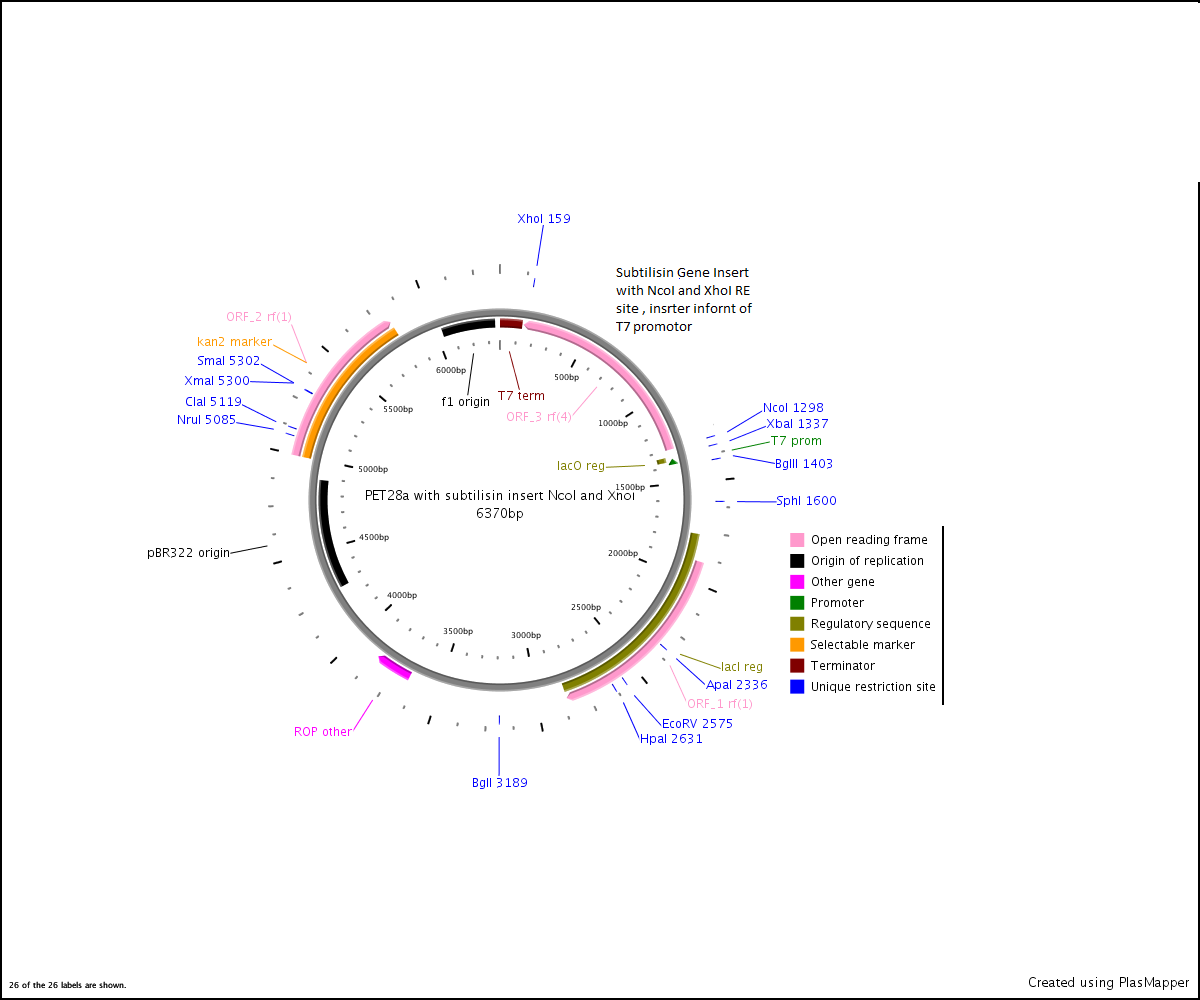


Subtilisin gene with NcoI & XhoI RE sites inserted after T7 Promotor

**Figure S3:** Plasmid Map of pET22 (a)+ vector with Subtilisin carlsberg


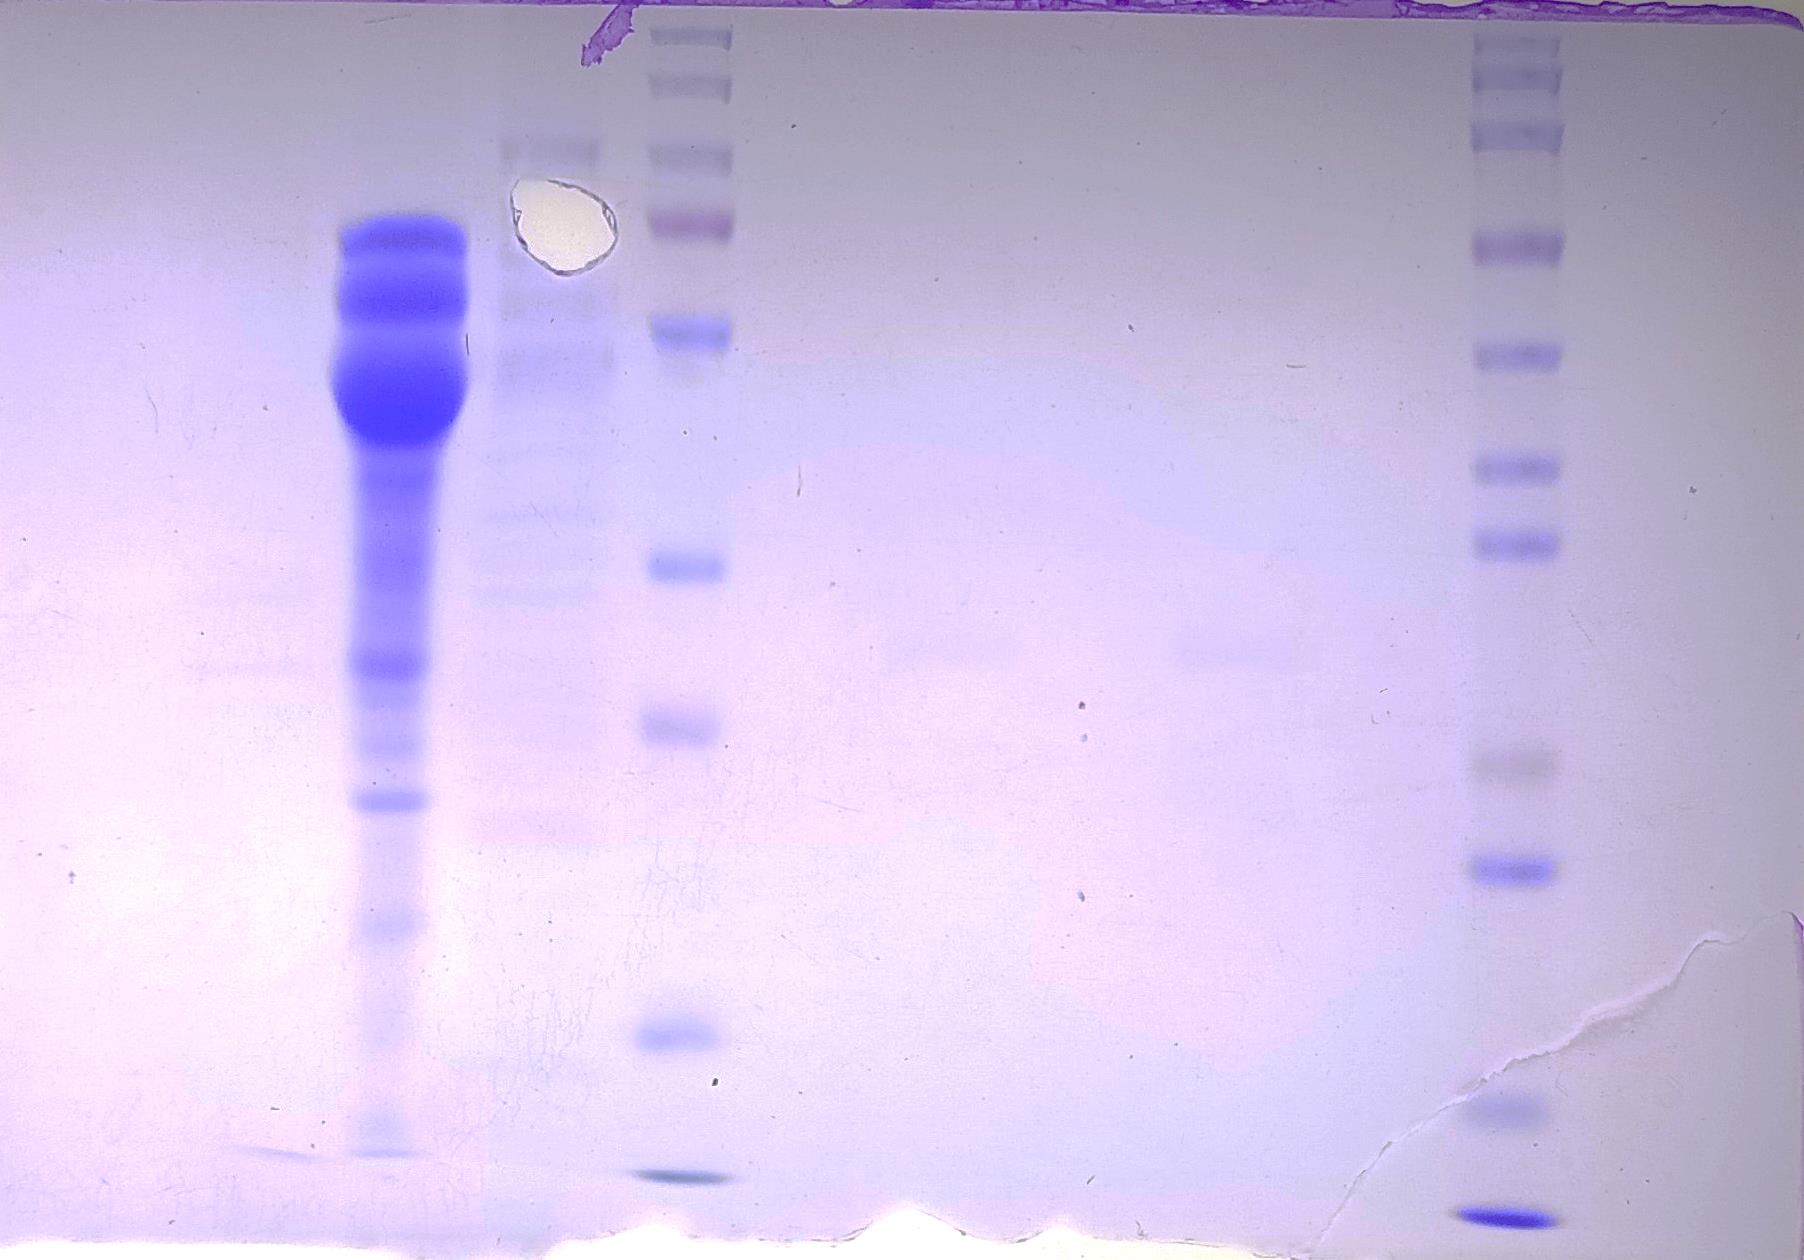


**PageRuler E 15 μL E 20 μL E Zokeyo**

**150**

**70**

**50**

**35**

**25**

**100**

**40**

**20**

**15**

**70**

**55**

**35**

**100**

**130**

**15**

**25**

E = Empty lane

**Figure S4:** SDS PAGE of subtilisin for the estimation it’s of molecular weight; The red arrow are used to show the bands of subtilisin. The first lane shows the bands of Page Ruler ladder, E shows empty lanes where no samples are loaded, 15 and 20 ul shows the concentration of protein loaded.


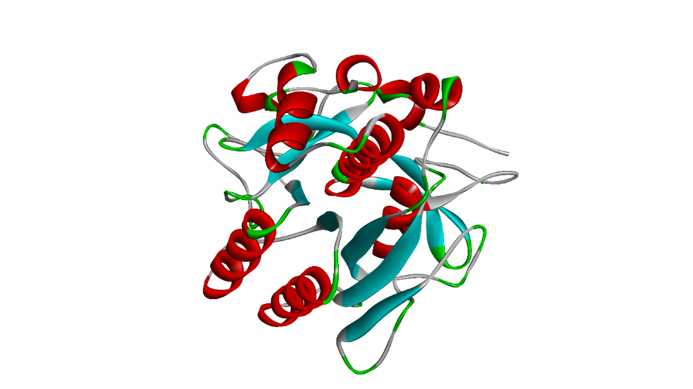


**Figure S5:** 3D structure model of the sequenced gene by homology modelling taking the coordinates of Subtilisin Carlsberg (PDB code: 1SBC)


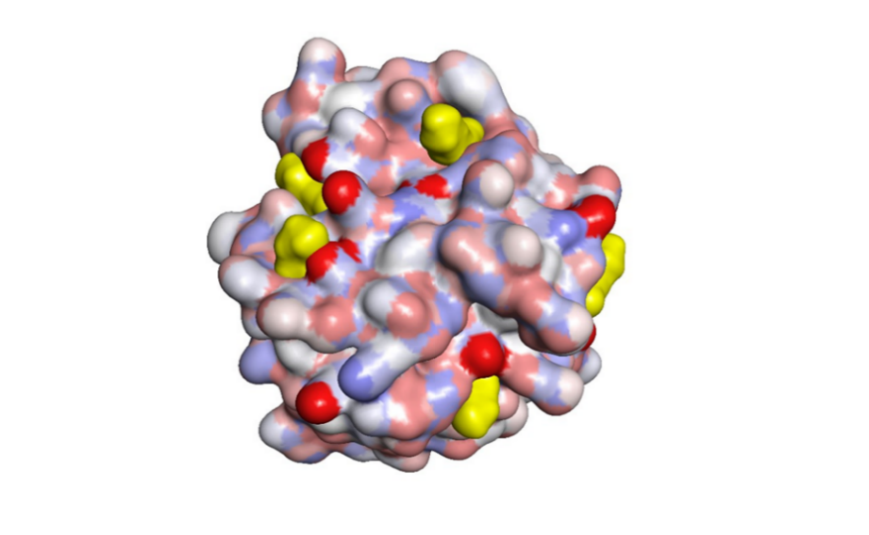


**Figure S6:** Surface of the selected model. Lysine residues located on the surface of the enzyme are coloured yellow.


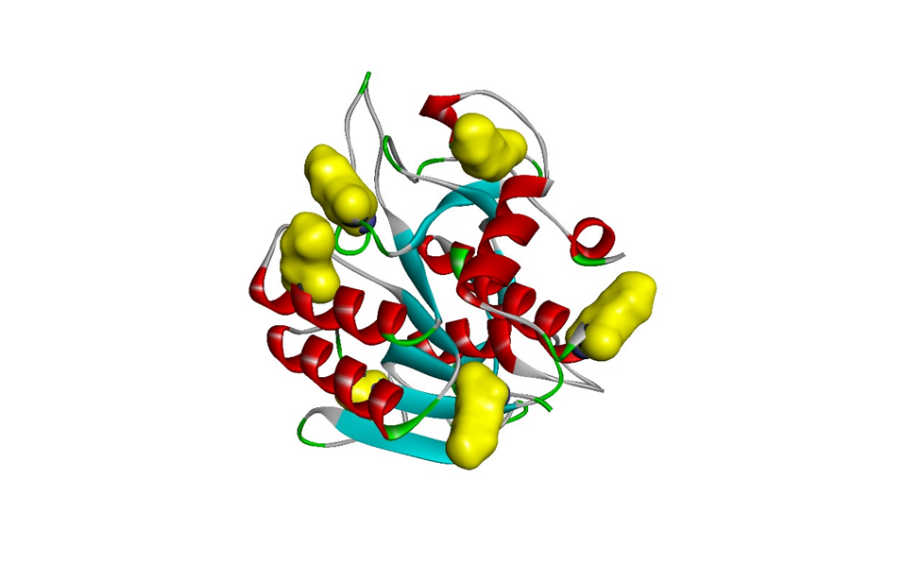


**Figure S7:** The selected model shown in cartoon representation. Lysine residues located on the surface of the enzyme are shown as yellow spheres.


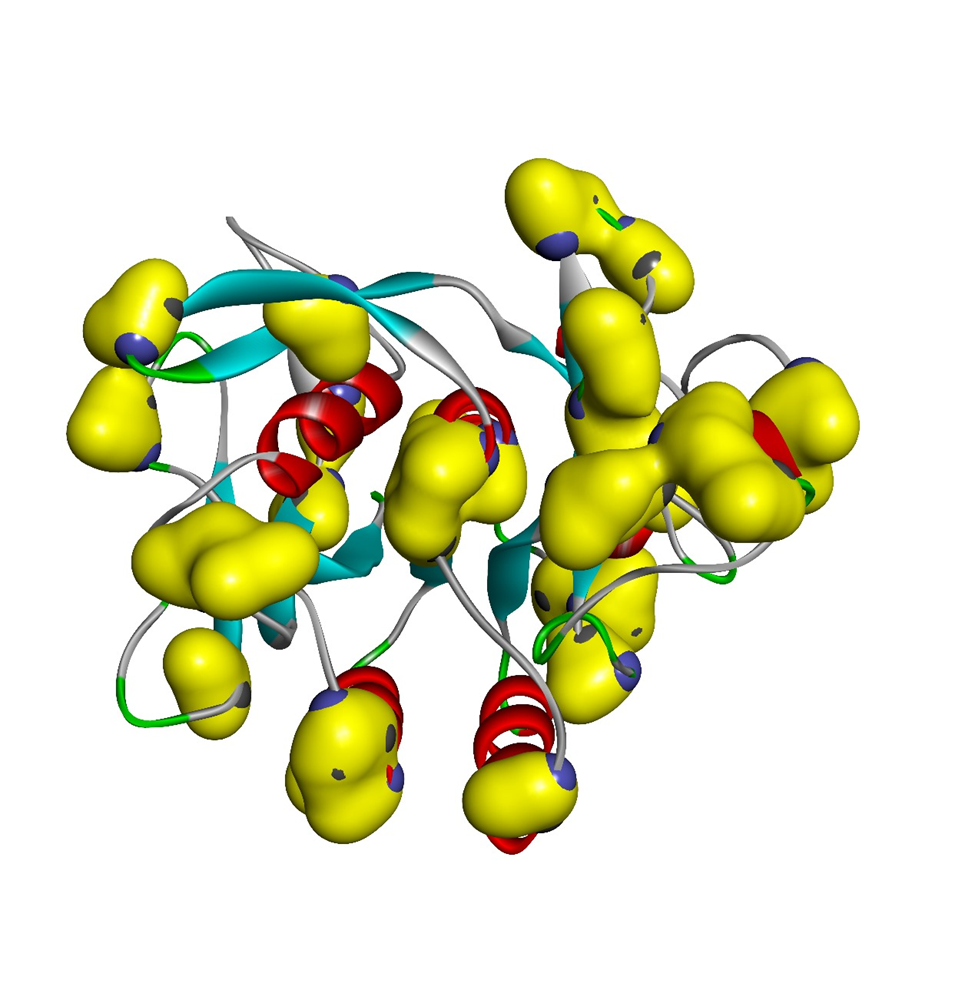


**Figure S8:** The selected model shown in cartoon representation. Serine residues in the enzyme are shown as yellow spheres.
